# Supplementary material
Source: MDPI journal article supplement (https://www.mdpi.com/2073-4441/15/12/2292)
Supplement: s1 [file s1]

# Fish Assemblages as Ecological Indicators in the Büyük Menderes (Great Meander) River, Turkey

Stamatis Zogaris <sup>1</sup>, Nicholas Koutsikos <sup>1, \*</sup>, Yorgos Chatzinikolaou <sup>2</sup>, Saniye Cevher Özeren <sup>3</sup>, Kaan Yence <sup>4</sup>, Vassiliki Vlami <sup>5</sup>, Pinar Güler Kohlmeier <sup>6</sup> and Gürçay Kıvanç Akyildiz <sup>7</sup>

## Supplementary Materials

**Table S1.** Data collected for the application of the EFI+ index for each site. These pertain to (1) water body name, (2) site name, (3) site altitude asl, (4) fished area of the site (in m<sup>2</sup>), (5) wetted width of the river channel during sampling, (6) presence of natural lakes upstream of site, (7) geomorphology of natural stream form, (8) presence of former floodplain conditions, (9) water source of river, (10) upstream drainage area, (11) distance from source (in km), (12) river gradient slope, (13) air temperature mean annual, (14) air temperature in January, (15) air temperature in July, (16) former sediment substrate size, (17) total number of fish caught, (18) number of fish below 15 cm, and (19) number of fish above 150 mm TL.

| 1                       | 2             | 3        | 4           | 5            | 6                     | 7                         | 8                  | 9            | 10                     | 11                   | 12          | 13                          | 14                      | 15                   | 16                   | 17                | 18                        |
|-------------------------|---------------|----------|-------------|--------------|-----------------------|---------------------------|--------------------|--------------|------------------------|----------------------|-------------|-----------------------------|-------------------------|----------------------|----------------------|-------------------|---------------------------|
| Water Body Name         | Site Name     | Altitude | Fished Area | Wetted Width | Natural Lake Upstream | Geomorphology             | Former Flood Plain | Water Source | Upstream Drainage Area | Distance from Source | River Slope | Air temperature Mean Annual | Air temperature January | Air temperature July | Former Sediment Size | Total number run1 | Number Length Below 15 cm |
| Asagi Saricay           | BMN37_ST01    | 11       | 200         | 5            | No                    | Meand regular             | Yes                | Pluvial      | 168                    | 6.64                 | 2           | 17.50833333                 | 8.7                     | 27                   | Sand                 | 83                | 83                        |
| Asagi Cine1             | BMN33_ST01    | 280      | 300         | 5            | No                    | Irregularly constraint no | No                 | Pluvial      | 102                    | 10.79                | 18          | 16.3                        | 7                       | 26.6                 | Sand                 | 23                | 23                        |
| Asagi Cine1             | BMN33-2       | 310      | 80          | 2.2          | No                    | Irregularly constraint no | No                 | Pluvial      | 13.5                   | 12.01                | 14          | 16.25833333                 | 7                       | 26.5                 | Boulder/Rock         | 28                | 28                        |
| Hamam 2                 | BMN07_ST01    | 380      | 380         | 2.8          | No                    | Irregularly constraint no | No                 | Pluvial      | 139.5                  | 14.44                | 16          | 13.60833333                 | 3.8                     | 23.5                 | Gravel/Pebble/Cot    | 225               | 224                       |
| Gokpinar Deresi         | BMN17_ST01    | 624      | 300         | 3            | No                    | Irregularly constraint no | No                 | Pluvial      | 188.5                  | 13.22                | 32          | 14.24166667                 | 4.4                     | 24.7                 | Gravel/Pebble/Cot    | 259               | 259                       |
| Yukari Buyuk Menderes1  | BMN12_ST02    | 843      | 390         | 7            | No                    | Sinuus                    | No                 | Pluvial      | 241.5                  | 9.29                 | 8           | 12.76666667                 | 3.1                     | 23                   | Sand                 | 55                | 55                        |
| Yukari Akcay1           | BMN23_ST02    | 894      | 180         | 4.5          | No                    | Sinuus                    | No                 | Pluvial      | 130                    | 19.68                | 2           | 13.275                      | 3.3                     | 23.9                 | Sand                 | 5                 | 4                         |
| Yukari Dandalaz         | BMN21_ST01    | 450      | 420         | 4.3          | No                    | Irregularly constraint no | No                 | Pluvial      | 297.5                  | 17.81                | 18          | 15.625                      | 5.8                     | 26.2                 | Gravel/Pebble/Cot    | 160               | 158                       |
| Yukari Ikizdere2        | BMN48_ST01    | 195      | 370         | 4.8          | No                    | Irregularly constraint no | No                 | Pluvial      | 70.5                   | 12.23                | 52          | 16.30833333                 | 7.2                     | 26.2                 | Gravel/Pebble/Cot    | 77                | 77                        |
| Yukari Ikizdere1        | BMN47_ST01    | 195      | 230         | 6.8          | No                    | Irregularly constraint no | No                 | Pluvial      | 89.5                   | 16.84                | 56          | 16.30833333                 | 7.2                     | 26.2                 | Gravel/Pebble/Cot    | 170               | 168                       |
| Asagi Akcay             | BMN28_ST02    | 60       | 500         | 8.5          | No                    | Sinuus                    | No                 | Pluvial      | 4400                   | 116.31               | 5           | 17.59166667                 | 7.9                     | 28.1                 | Gravel/Pebble/Cot    | 4                 | 4                         |
| Asagi Cine2             | BMN34_ST02    | 40       | 600         | 30           | No                    | Sinuus                    | No                 | Pluvial      | 2840                   | 82.68                | 6           | 17.85                       | 8.4                     | 28                   | Gravel/Pebble/Cot    | 13                | 13                        |
| Girme Deresi            | BMN29_ST01    | 497      | 180         | 2.5          | No                    | Irregularly constraint no | No                 | Pluvial      | 32.5                   | 7.88                 | 8           | 15.825                      | 6.7                     | 26                   | Gravel/Pebble/Cot    | 2                 | 2                         |
| Yukari Cine1            | BMN30_ST01    | 266      | 130         | 7            | No                    | Irregularly constraint no | No                 | Pluvial      | 1190                   | 39.05                | 12          | 16.6                        | 7.4                     | 26.9                 | Boulder/Rock         | 2                 | 2                         |
| Asagi Dandalaz          | BMN22_ST01    | 83       | 210         | 9            | No                    | Sinuus                    | No                 | Pluvial      | 1184                   | 43.88                | 12          | 17.475                      | 7.9                     | 27.8                 | Gravel/Pebble/Cot    | 23                | 23                        |
| Asagi Buyuk Menderes1   | BMN55_ST01    | 21       | 800         | 50           | No                    | Meand tortous             | Yes                | Pluvial      | 22100                  | 440.4                | 6           | 17.59166667                 | 8.3                     | 27.6                 | Sand                 | 20                | 20                        |
| Asagi Cine3             | BMN35_ST01    | 132      | 480         | 4            | No                    | Irregularly constraint no | No                 | Pluvial      | 306                    | 18.51                | 42          | 17.20833333                 | 7.7                     | 27.4                 | Gravel/Pebble/Cot    | 11                | 11                        |
| Yukari Cine3            | BMN32_ST01    | 556      | 180         | 3.5          | No                    | Irregularly constraint no | No                 | Groundwater  | 63.5                   | 10.81                | 64          | 15.14166667                 | 5.6                     | 25.6                 | Boulder/Rock         | 128               | 128                       |
| Yukari Akcay1           | BMN23_ST02    | 894      | 200         | 4            | No                    | Sinuus                    | No                 | Pluvial      | 130                    | 19.68                | 2           | 13.275                      | 3.3                     | 23.9                 | Sand                 | 3                 | 3                         |
| Yukari Akcay3           | BMN25_ST01    | 588      | 450         | 6            | No                    | Sinuus                    | No                 | Pluvial      | 672                    | 50.98                | 6           | 15.14166667                 | 5.3                     | 25.8                 | Gravel/Pebble/Cot    | 76                | 76                        |
| Yukari Dandalaz         | BMN21_ST01    | 450      | 600         | 4.3          | No                    | Irregularly constraint no | No                 | Pluvial      | 297.5                  | 17.81                | 18          | 15.625                      | 5.8                     | 26.2                 | Gravel/Pebble/Cot    | 68                | 64                        |
| Isikli                  | BMG01_ST01_5  | 818      | 200         | 18           | No                    | Meand tortous             | Yes                | Pluvial      | 960                    | 28.04                | 2           | 12.925                      | 3.2                     | 23.2                 | Silt                 | 75                | 75                        |
| Kufi4                   | BMN11_Bu      | 821      | 600         | 12           | No                    | Meand regular             | Yes                | Groundwater  | 3000                   | 84.18                | 2           | 12.85833333                 | 3.1                     | 23                   | Silt                 | 1                 | 1                         |
| Yukari Akcay4           | BMN26_ST01    | 318      | 700         | 37           | No                    | Braided                   | No                 | Pluvial      | 1650                   | 55.93                | 1           | 16.69166667                 | 7.2                     | 27.3                 | Gravel/Pebble/Cot    | 7                 | 7                         |
| Yukari Cine3            | BMN32_ST01    | 556      | 280         | 4.5          | No                    | Irregularly constraint no | No                 | Groundwater  | 63.5                   | 10.81                | 64          | 15.14166667                 | 5.6                     | 25.6                 | Boulder/Rock         | 66                | 66                        |
| Yukari Ikizdere2        | BMN48_ST01    | 195      | 400         | 5            | No                    | Irregularly constraint no | No                 | Pluvial      | 70.5                   | 12.23                | 52          | 16.30833333                 | 7.2                     | 26.2                 | Gravel/Pebble/Cot    | 54                | 54                        |
| Asagi Buyuk Menderes2   | BMN56_ST02    | 4        | 50          | 30           | Yes                   | Meand tortous             | Yes                | Pluvial      | 25734                  | 550.13               | 1           | 17.65                       | 9.7                     | 27.2                 | Silt                 | 145               | 145                       |
| Asagi Buyuk Menderes2   | BMN56_ST02_ds | 4        | 250         | 40           | Yes                   | Meand tortous             | Yes                | Pluvial      | 25745                  | 549.33               | 1           | 17.675                      | 9.8                     | 27.1                 | Silt                 | 2                 | 0                         |
| Asagi Buyuk Menderes2   | BMN56_ST02_nc | 1        | 500         | 43           | Yes                   | Meand tortous             | Yes                | Pluvial      | 25900                  | 571.25               | 1           | 17.99166667                 | 10                      | 26.7                 | Silt                 | 3                 | 3                         |
| Asagi Buyuk Menderes2   | BMN56_ST02_m  | 1        | 300         | 36           | Yes                   | Meand tortous             | Yes                | Pluvial      | 25805                  | 568.36               | 2           | 17.99166667                 | 10                      | 26.7                 | Silt                 | 7                 | 7                         |
| Asagi Buyuk Menderes1   | BMN55_ST01    | 21       | 450         | 50           | No                    | Meand tortous             | Yes                | Pluvial      | 22100                  | 440.4                | 6           | 17.59166667                 | 8.3                     | 27.6                 | Sand                 | 22                | 22                        |
| Yukari Banaz            | BMN01_N3      | 916      | 400         | 5            | No                    | Sinuus                    | No                 | Pluvial      | 387                    | 21.46                | 1           | 12.075                      | 2.2                     | 22.3                 | Gravel/Pebble/Cot    | 25                | 24                        |
| Yukari Buyuk Menderes 2 | BMN13_ST01    | 811      | 600         | 18           | Yes                   | Sinuus                    | No                 | Pluvial      | 3600                   | 118.86               | 4           | 13.04166667                 | 3.2                     | 23.3                 | Gravel/Pebble/Cot    | 13                | 13                        |
| Yukari Buyuk Menderes 1 | BMN12_ST02    | 843      | 600         | 7            | No                    | Sinuus                    | No                 | Pluvial      | 241.5                  | 9.29                 | 8           | 12.76666667                 | 3.1                     | 23                   | Sand                 | 5                 | 5                         |
| Asagi Banaz2            | BMN03_ST02    | 539      | 180         | 5            | No                    | Irregularly constraint no | No                 | Pluvial      | 5270                   | 115.27               | 4           | 14.14166667                 | 4.4                     | 24.1                 | Gravel/Pebble/Cot    | 19                | 19                        |
| Orta Buyuk Menderes     | BMN20_ST02    | 115      | 150         | 9.5          | No                    | Sinuus                    | No                 | Pluvial      | 10980                  | 296.96               | 14          | 17.25                       | 7.7                     | 27.4                 | Gravel/Pebble/Cot    | 3                 | 3                         |
| Yukari Akcay3           | BMN25_ST01_01 | 541      | 250         | 6            | No                    | Irregularly constraint no | No                 | Pluvial      | 540                    | 56.76                | 16          | 15.13333333                 | 5.2                     | 25.8                 | Gravel/Pebble/Cot    | 52                | 52                        |
| Yukari Akcay4           | BMN26_ST01    | 318      | 450         | 37           | No                    | Braided                   | No                 | Pluvial      | 1650                   | 55.93                | 1           | 16.69166667                 | 7.2                     | 27.3                 | Gravel/Pebble/Cot    | 32                | 31                        |
| Asagi Buyuk Menderes2   | BMN56_ST02    | 4        | 100         | 30           | Yes                   | Meand tortous             | Yes                | Pluvial      | 25734                  | 550.13               | 1           | 17.65                       | 9.7                     | 27.2                 | Silt                 | 5                 | 5                         |
| Asagi Ikizdere2         | BMN50_ST01    | 23       | 400         | 5            | No                    | Meand regular             | Yes                | Pluvial      | 530                    | 32.58                | 6           | 17.7                        | 8.4                     | 27.7                 | Silt                 | 2                 | 2                         |
| Naipili Cayi            | BMN53_ST01    | 164      | 400         | 6.5          | No                    | Sinuus                    | No                 | Pluvial      | 78                     | 2.9                  | 12          | 16.35                       | 8                       | 25.3                 | Gravel/Pebble/Cot    | 42                | 41                        |
| Yukari Ikizdere1        | BMN47_ST01    | 195      | 410         | 6.8          | No                    | Irregularly constraint no | No                 | Pluvial      | 89.5                   | 16.84                | 56          | 16.30833333                 | 7.2                     | 26.2                 | Gravel/Pebble/Cot    | 75                | 75                        |
| Yukari Buyuk Menderes 2 | BMN13_ST01    | 811      | 600         | 20           | Yes                   | Sinuus                    | No                 | Pluvial      | 3600                   | 118.86               | 4           | 13.04166667                 | 3.2                     | 23.3                 | Sand                 | 10                | 8                         |
| Orta Buyuk Menderes     | BMN20_ST02    | 115      | 220         | 20           | No                    | Sinuus                    | No                 | Pluvial      | 10980                  | 296.96               | 14          | 17.25                       | 7.7                     | 27.4                 | Gravel/Pebble/Cot    | 1                 | 1                         |

**Table S2.** The European Fish Index (EFI+) adaptation of the species. Column 1 gives the documented taxon name (as identified in this study). Column 2 gives the name used within the EFI+ software, i.e., the identical name, the adaptation (based on slight taxonomic changes), or the congeneric/ecologically equivalent surrogate name. By congeneric surrogate, we mean that an ecologically equivalent species that is of the same genus (or closely related genus) was chosen in place of the local endemic form that does not exist in the European Union states or the EFI+ database. Column 3 shows which names were changed and in what category pertaining to column 3. Species with (+) are considered alien (non-indigenous, including translocated species) to the river basin in this study.

| 1                                     | 2                               | 3                     |
|---------------------------------------|---------------------------------|-----------------------|
| Taxon                                 | EFI+ Name Used                  | Name changes for EFI+ |
| <i>Alburnoides smyrnae</i>            | <i>Alburnoides bipunctatus</i>  | Adaptation            |
| <i>Alburnus demiri</i>                | <i>Alburnus alburnus</i>        | Adaptation            |
| <i>Anatolichthys maeandricus</i>      | <i>Aphanius iberus</i>          | Congeneric surrogate  |
| <i>Barbus xanthos</i>                 | <i>Barbus cyclolepis</i>        | Adaptation            |
| <i>Capoeta aydinensis</i>             | <i>Barbus albanicus</i>         | Congeneric surrogate  |
| <i>Carassius gibelio</i> +            | <i>Carassius gibelio</i> +      | Identical             |
| <i>Chelon labrosu</i>                 | <i>Chelon labrosus</i>          | Identical             |
| <i>Chondrostoma turnai/meandrense</i> | <i>Chondrostoma nasus</i>       | Congeneric surrogate  |
| <i>Cobitis afifeae</i>                | <i>Cobitis taenia</i>           | Congeneric surrogate  |
| <i>Cyprinus carpio</i> +              | <i>Cyprinus carpio</i> +        | Identical             |
| <i>Dicentrarchus labrax</i>           | <i>Dicentrarchus labrax</i>     | Identical             |
| <i>Gambusia holbrooki</i> +           | <i>Gambusia holbrooki</i> +     | Identical             |
| <i>Garra menderesensis</i>            | <i>Pachychilon macedonicus</i>  | Congeneric surrogate  |
| <i>Gobio maeandricus</i>              | <i>Gobio gobio</i>              | Adaptation            |
| <i>Knipowitschia caucasica</i>        | <i>Knipowitschia caucasica</i>  | Identical             |
| <i>Lepomis gibbosus</i> +             | <i>Lepomis gibbosus</i> +       | Identical             |
| <i>Liza ramada</i>                    | <i>Liza ramada</i>              | Identical             |
| <i>Liza saliens</i>                   | <i>Liza saliens</i>             | Identical             |
| <i>Luciobarbus kottelati</i>          | <i>Barbus graecus</i>           | Adaptation            |
| <i>Mugil cephalus</i>                 | <i>Mugil cephalus</i>           | Identical             |
| <i>Oxynoemacheilus germencicus</i>    | <i>Barbatula bureschi</i>       | Adaptation            |
| <i>Petroleuciscus ninae</i>           | <i>Leuciscus borysthenticus</i> | Adaptation            |
| <i>Pseudorasbora parva</i> +          | <i>Pseudorasbora parva</i> +    | Identical             |
| <i>Rhodeus amarus</i> +               | <i>Rhodeus amarus</i> +         | Identical             |
| <i>Squalius fellowesi/carinus</i>     | <i>Leuciscus cephalus</i>       | Congeneric surrogate  |
| <i>Tinca tinca</i> +                  | <i>Tinca tinca</i> +            | Identical             |
| <i>Vimba mirabilis</i>                | <i>Vimba vimba</i>              | Congeneric surrogate  |
